# Supplementary material for: Long-Lasting T Cell Responses in BNT162b2 COVID-19 mRNA Vaccinees and COVID-19 Convalescent Patients
Source: Frontiers journal article supplement (doi:10.3389/fimmu.2022.869990), 2022-04-22
Supplement: Data_Sheet_1.pdf [file Data_Sheet_1.pdf]

**Supplementary table 1. Peptide pools mapping SARS-CoV-2 spike protein.**

| <b>Product</b>                               | <b>Manufacturer</b>      | <b>Cat#</b>       | <b>Number of spike aa changes <sup>a</sup></b> |
|----------------------------------------------|--------------------------|-------------------|------------------------------------------------|
| PepMix™ SARS-CoV-2 (Spike Glycoprotein)      | JPT Peptide Technologies | PM-WCPV-S-1       | -                                              |
| PepMix™ SARS-CoV-2 (Spike B.1.1.7 / Alpha)   | JPT Peptide Technologies | PM-SARS2-SMUT01-1 | 10                                             |
| PepMix™ SARS-CoV-2 (Spike B.1.351 / Beta)    | JPT Peptide Technologies | PM-SARS2-SMUT02-1 | 10                                             |
| PepMix™ SARS-CoV-2 (Spike P.1 / Gamma)       | JPT Peptide Technologies | PM-SARS2-SMUT03-1 | 12                                             |
| PepMix™ SARS-CoV-2 (Spike B.1.617.2 / Delta) | JPT Peptide Technologies | PM-SARS2-SMUT06-1 | 10                                             |

**a**, compared to spike protein of wild type SARS-CoV-2

**Supplementary table 2. Fluorochrome labelled antibodies in FACS.**

| <b>Antibody</b>  | <b>Fluorochrome</b> | <b>Manufacturer</b>          | <b>Cat#</b> |
|------------------|---------------------|------------------------------|-------------|
| Anti-human CD45  | APC-eFluor780       | Invitrogen/Life technologies | 47-0459-42  |
| Anti-human CD3   | eFluor506           | Invitrogen/Life technologies | 69-0038-42  |
| Anti-human CD4   | eFluor450           | Invitrogen/Life technologies | 48-0049-42  |
| Anti-human CD8a  | PerCP-eFluor710     | Invitrogen/Life technologies | 46-0087-42  |
| Anti-human CD69  | PE                  | BD Biosciences               | 555531      |
| Anti-human CD134 | PE/Cyanine7         | BioLegend                    | 350012      |
| Anti-human CD137 | APC                 | BioLegend                    | 309810      |

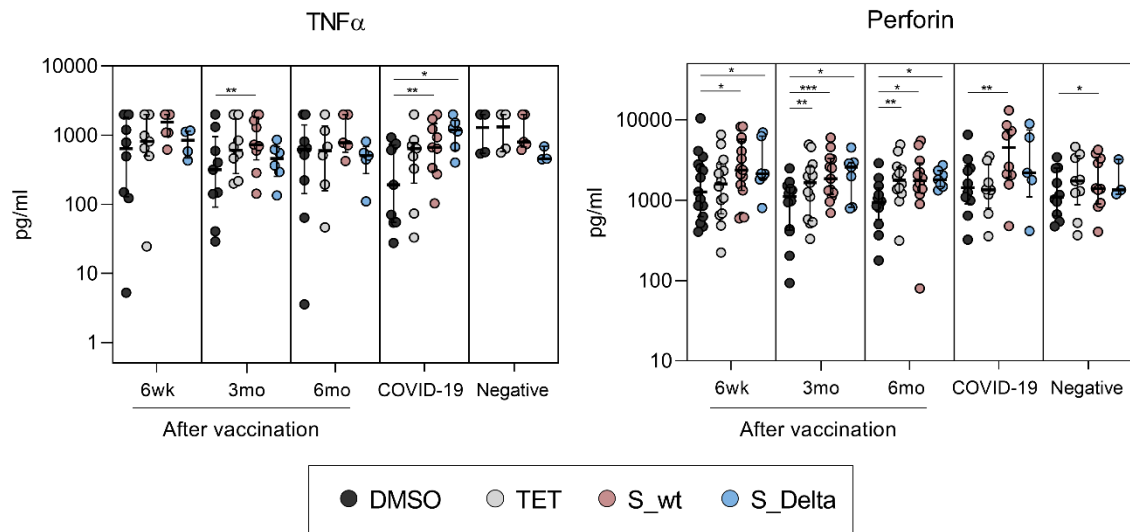

**Supplementary Fig. 1 Measurement of secreted TNF $\alpha$  and perforin after T cell stimulation.** PBMCs collected from vaccinated HCWs (n=15), COVID-19 patients (n=10), and negative controls (n=10) were stimulated with DMSO, tetanus toxoid (TET), and SARS-CoV-2 peptide pools spanning the spike protein of wild type Wuhan Hu (S\_wt) and Delta variant (S\_Delta). Secreted TNF $\alpha$  and perforin levels were measured with Luminex based multiplex immunoassay. Delta variant S peptide stimulation was performed to 7/15 vaccinated, 6/10 COVID-19 patients, and 3/10 negative controls. Data is represented as median and interquartile range. Statistical analysis was performed with Wilcoxon signed rank test for comparison of S\_wt stimulations with S\_Delta stimulations, and comparison of tetanus and S\_wt and S\_Delta stimulations with negative DMSO control. Samples with no data on both data points were excluded from statistical analysis. \*p<0.05; \*\*p<0.01; \*\*\*p<0.001.
